# Supplementary material for: Bacillus coagulans: a viable adjunct therapy for relieving symptoms of rheumatoid arthritis according to a randomized, controlled trial
Source: Springer Nature journal article supplement (doi:10.1186/1472-6882-10-1), 2010-01-12

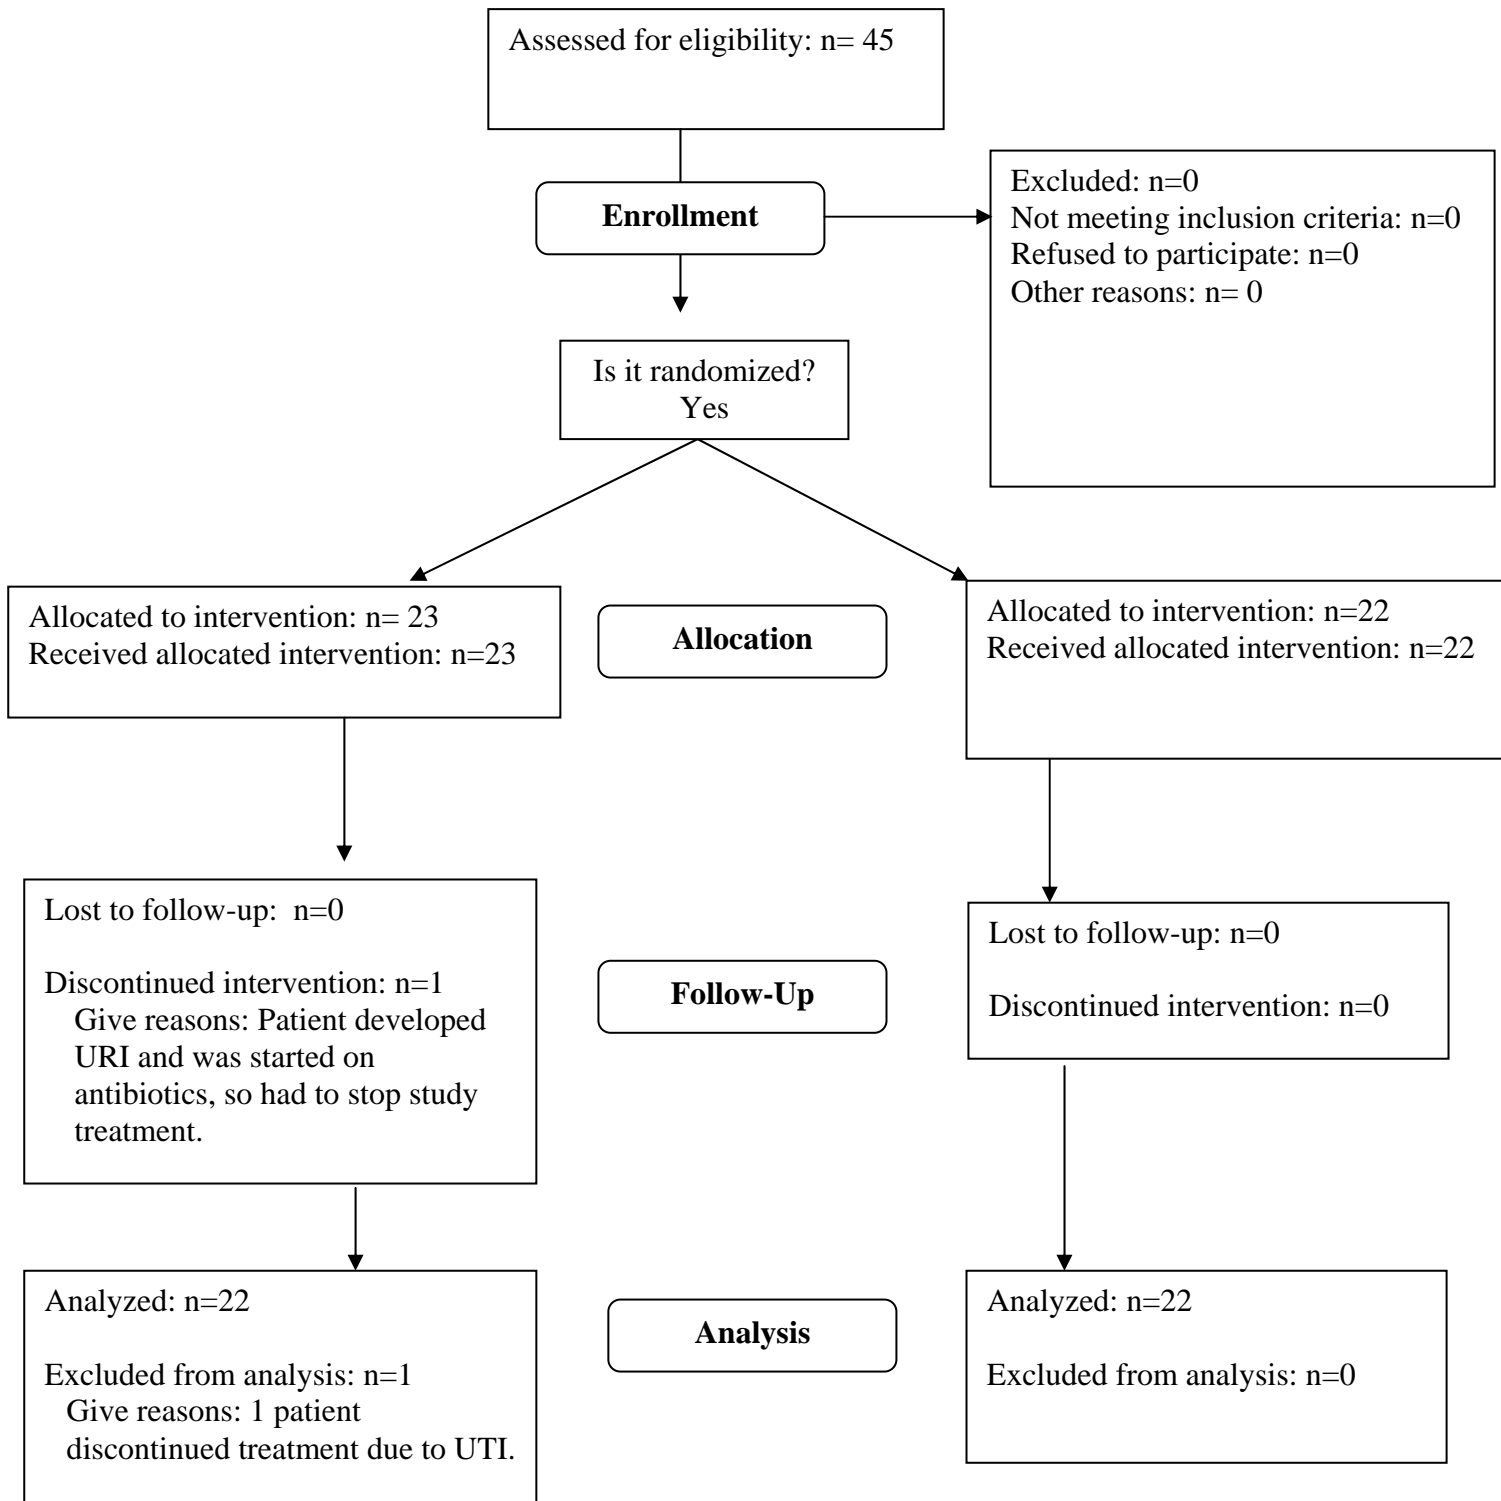

Supplement: 12906_2009_278_MOESM1_ESM.pdf [file 12906_2009_278_MOESM1_ESM.pdf]
